# Supplementary material for: Impact of different roasting conditions on chemical composition, sensory quality and physicochemical properties of waxy-barley products
Source: Royal Society of Chemistry journal article supplement (doi:10.1039/c9fo01429b), 2019-01-01
Supplement: c9fo01429b1.pdf [file c9fo01429b1.pdf]

**Table S1** Molar mass ( $M_w$ ,  $M_n$ ) and polydispersity of isolated  $\beta$ -glucans from different raw and roasted barley products

| RT [°C]             | $M_w$ ( $\beta$ -glucan)<br>[ $10^6$ g/mol] | $M_n$ ( $\beta$ -glucan)<br>[ $10^6$ g/mol] | $M_w/M_n$<br>( $\beta$ -glucan) |
|---------------------|---------------------------------------------|---------------------------------------------|---------------------------------|
| <b>Kernels</b>      |                                             |                                             |                                 |
| Raw                 | 3.12                                        | 1.54                                        | 2.03                            |
| 160                 | 1.91                                        | 0.91                                        | 2.10                            |
| 170                 | 2.53                                        | 2.07                                        | 1.22                            |
| 180                 | 1.41                                        | 1.10                                        | 1.28                            |
| <b>Thin flakes</b>  |                                             |                                             |                                 |
| Raw                 | 3.34                                        | 1.38                                        | 2.42                            |
| 160                 | 5.96                                        | 3.71                                        | 1.61                            |
| 170                 | 2.68                                        | 1.77                                        | 1.51                            |
| 180                 | 4.27                                        | 2.31                                        | 1.85                            |
| <b>Thick flakes</b> |                                             |                                             |                                 |
| Raw                 | 2.37                                        | 1.56                                        | 1.52                            |
| 160                 | 2.90                                        | 2.08                                        | 1.39                            |
| 170                 | 2.07                                        | 1.29                                        | 1.60                            |
| 180                 | 2.65                                        | 1.35                                        | 1.96                            |

Results of a single measurement.  $M_n$ : number-average,  $M_w$ : weight-average,  $M_w / M_n$ : polydispersity, RT: roasting temperature
